# Supplementary material for: Ovulation and extra-ovarian origin of ovarian cancer
Source: PubMed Central journal article supplement — Sci Rep. 2014 Aug 19;4:6116. doi: 10.1038/srep06116 (PMC4137344; doi:10.1038/srep06116), 2014-08-19
Supplement: srep06116-s1.pdf [file srep06116-s1.pdf]

## **Ovulation and extraovarian origin of ovarian cancer**

Yang Yang-Hartwich, Marta Gurrea-Soteras, Natalia Sumi, Won Duk Joo,  
Jennie C. Holmberg, Vinicius Craveiro, Ayesha B. Alvero, Gil Mor

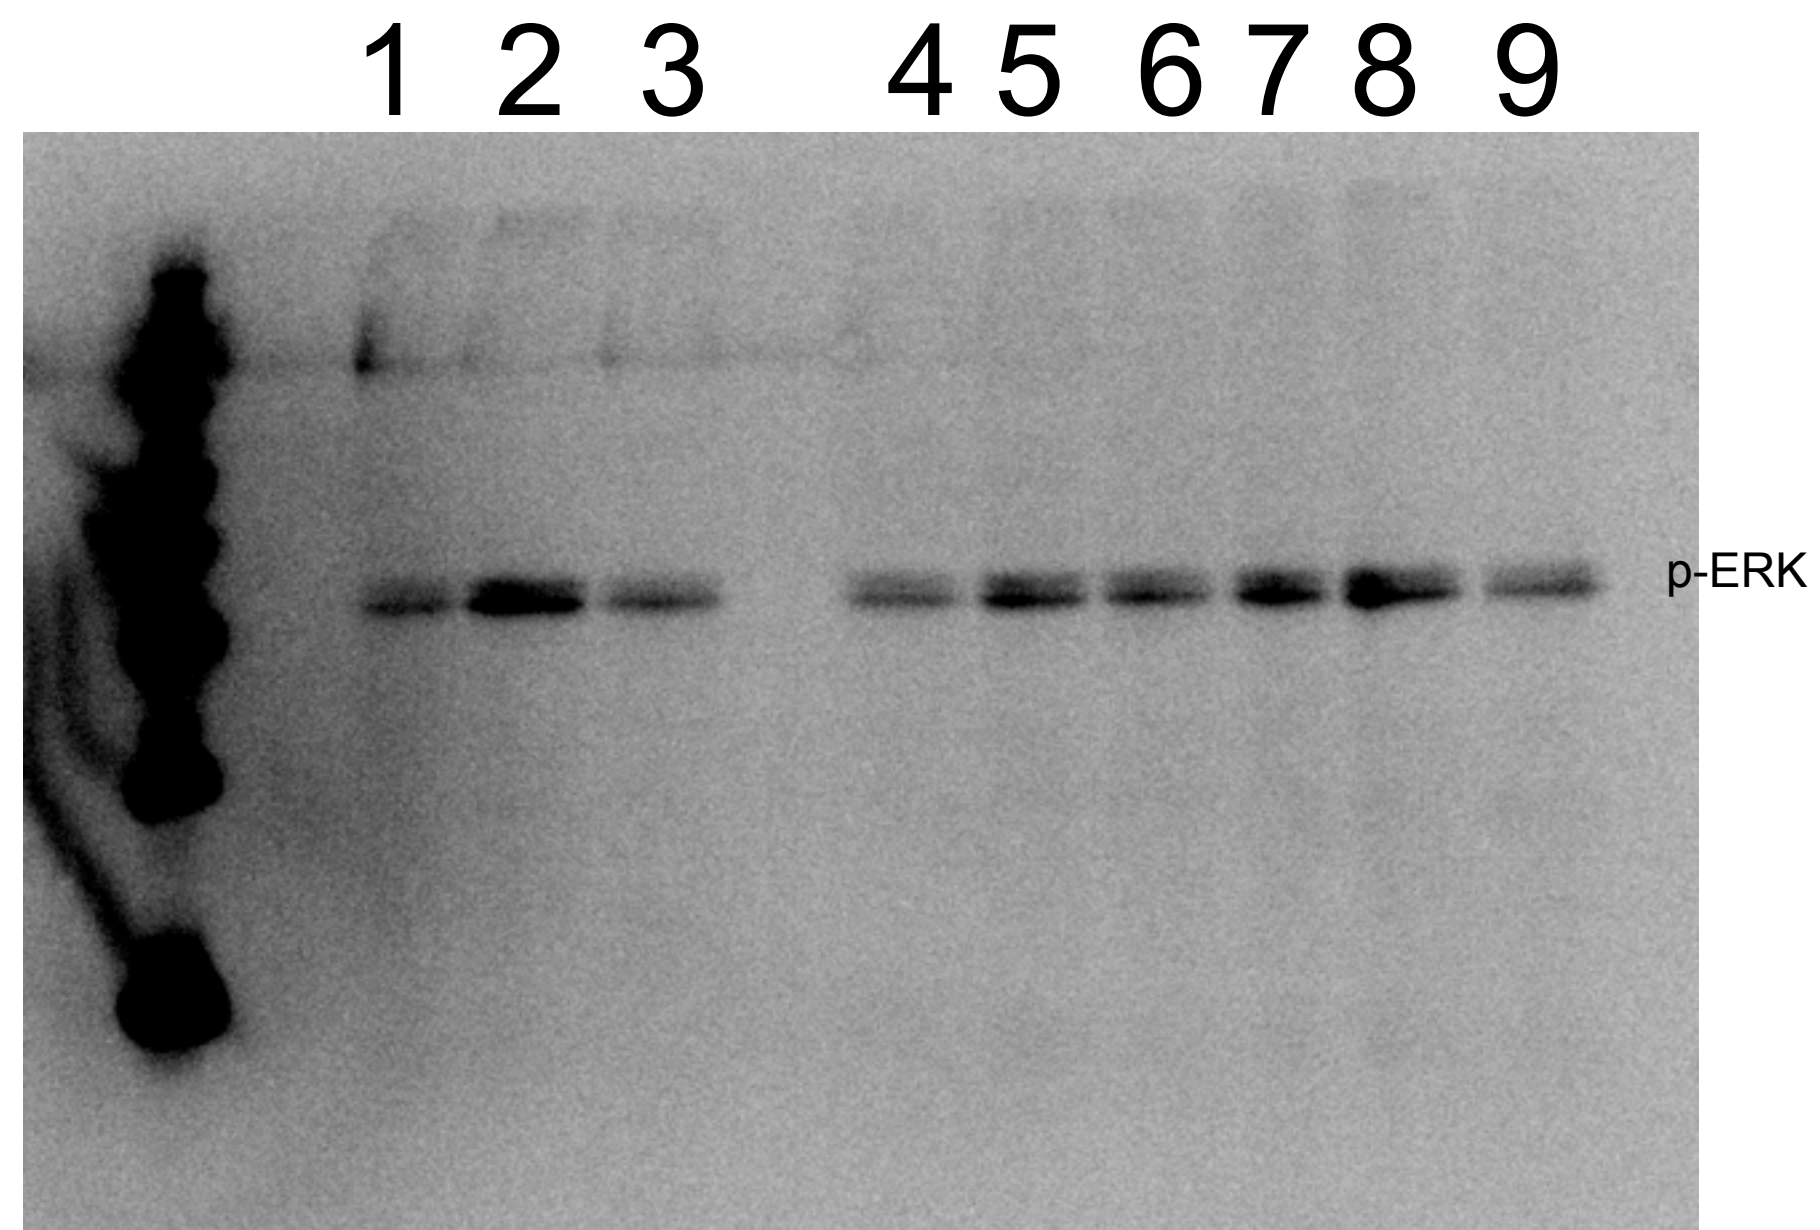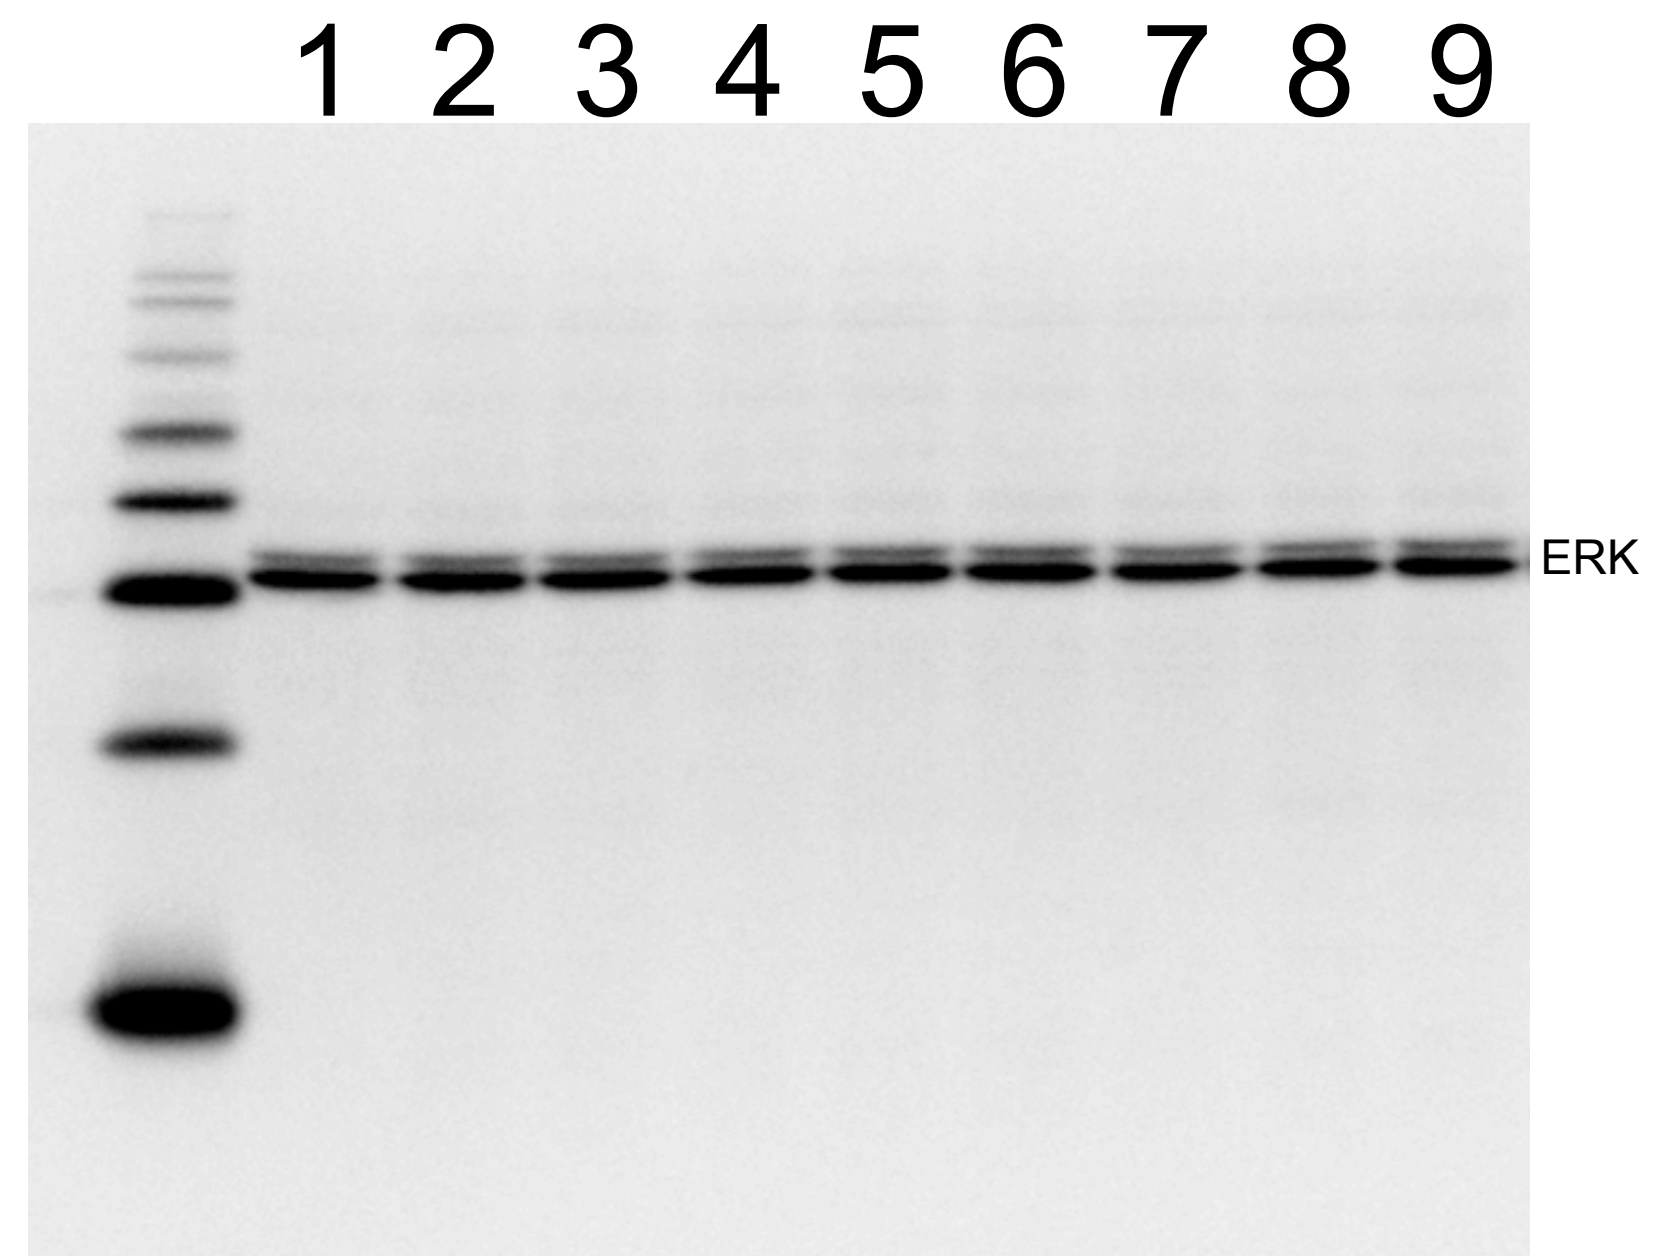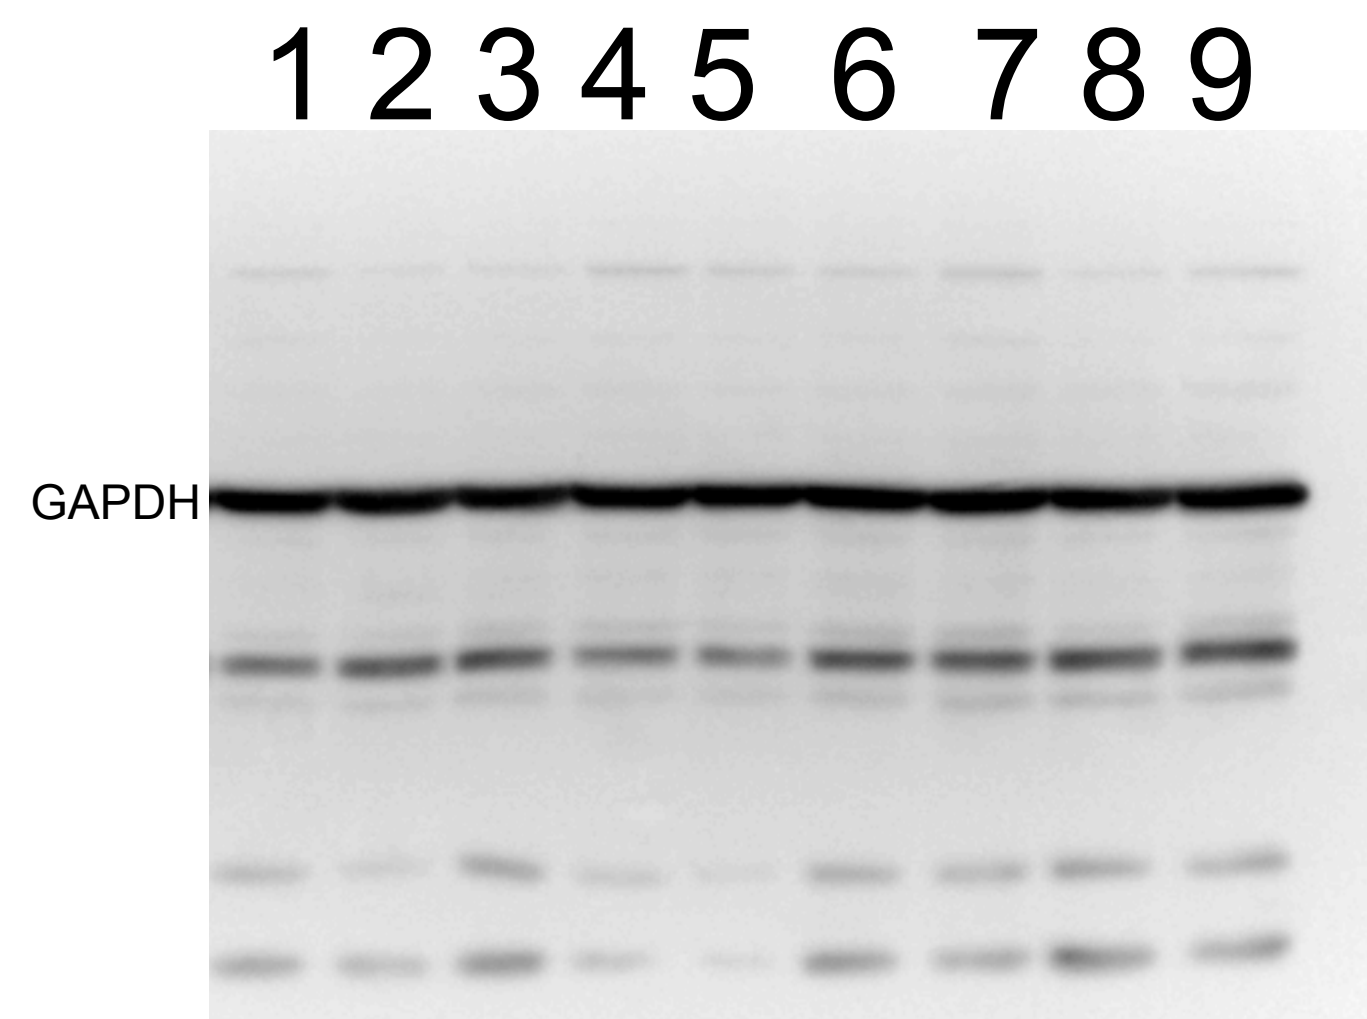

### Full-length blot

For figure 4E:

Lane 1: control

Lane 2: lut-KGN CM

Lane 3: lut-KGN CM +AMD3100

For figure 5C:

|         | Control |   |   | TNF $\alpha$ |   |   |
|---------|---------|---|---|--------------|---|---|
| SDF-1   | -       | + | + | -            | + | + |
| AMD3100 | -       | - | + | -            | - | + |
|         | 4       | 5 | 6 | 7            | 8 | 9 |
